# Supplementary material
Source: publisher site journal article supplement (https://www.dovepress.com/article/497838)
Supplement: Supplementary file 1 [file get_supplementary_file.php]

**Supplemental Table 1.** ICD-codes and CPT-codes for acute oropharyngeal infection and respiratory tract infection and testing.

| Acute oropharyngeal infection (ICD codes) | A49.1, J02, J02.0, J02.8, J02.9, J03, J03.0, J03.00, J03.01, J03.8, J03.80, J03.81, J03.9, J03.90, J03.91, J04, J04.0, J06.0, or R07.0 |
| --- | --- |
| Culture (CPT codes) | 87070, 87071, 87077, 87081, 87084, 87140, 87143, 87147, 87149, 87150, 87181, 87184, 87185, 87186 |
| PCR (CPT codes) | 87486, 87498, 87502, 87503, 87581, 87631, 87632, 87633, 87634, 87635, 87636, 87637, 87651, 87798, 87801 |
| Rapid antigen tests (CPT codes) | 87804, 87811, 87880 |
| Respiratory tract infection (ICD codes) | B34.8, B34.9, J00, J01, J01.0, J01.00, J01.01, J01.1, J01.10, J01.11, J01.2, J01.20, J01.21, J01.3, J01.30, J01.31, J01.4, J01.40, J01.41, J01.8, J01.80, J01.81, J01.9, J01.90, J01.91, J06.9, J09.X2, J10.1, J11.1, J20, J20.0, J20.1, J20.2, J20.3, J20.4, J20.5, J20.6, J20.7, J20.8, J20.9, R05.1, R05.2, R06.02, R06.2, R07.1, R09.3, R09.81, or R50.9 |
| Culture (CPT codes) | 87070, 87071, 87077, 87081, 87084, 87140, 87143, 87147, 87149, 87150, 87181, 87184, 87185, 87186 |
| PCR (CPT codes) | 0098U, 0099U, 0100U, 0115U, 0151U, 0202U, 0223U, 0225U, 87486, 87498, 87502, 87503, 87541, 87581, 87631, 87632, 87633, 87634, 87635, 87636, 87637, 87640, 87653, 87798, 87801, U0003 |
| Rapid antigen tests (CPT codes) | 87804, 87807, 87811 |
